# Supplementary material for: Muscle Loss Is Associated with Overall Survival in Patients with Metastatic Colorectal Cancer Independent of Tumor Mutational Status and Weight Loss
Source: PubMed Central journal article supplement — Oncologist. 2021 May 6;26(6):e963–70. doi: 10.1002/onco.13774 (PMC8176987; doi:10.1002/onco.13774), 2021-05-06

Supplemental Figure for:  
Muscle Loss is Associated with Overall Survival in Patients with Metastatic Colorectal Cancer Independent of Tumor Mutational Status and Weight Loss  
Till Dominik Best et al.

### Supplemental Figure 1. Timing of Follow-up Scans.

Bee plot overlaid with boxplots showing the distribution of CT scan dates around each of the three follow-up time points. The x-axis is relative to the baseline CT scan. Therefore, all baseline scans are exactly on day 0 (n = 226). Red vertical lines indicate the exact date, and gray dashed lines indicate the 45-day range. To account for the fluctuation of scan intervals, we performed linear interpolation to calculate percent change from baseline to exactly 3-, 6- and 12- month follow-up (see Patients and Methods).

CT, computed tomography.

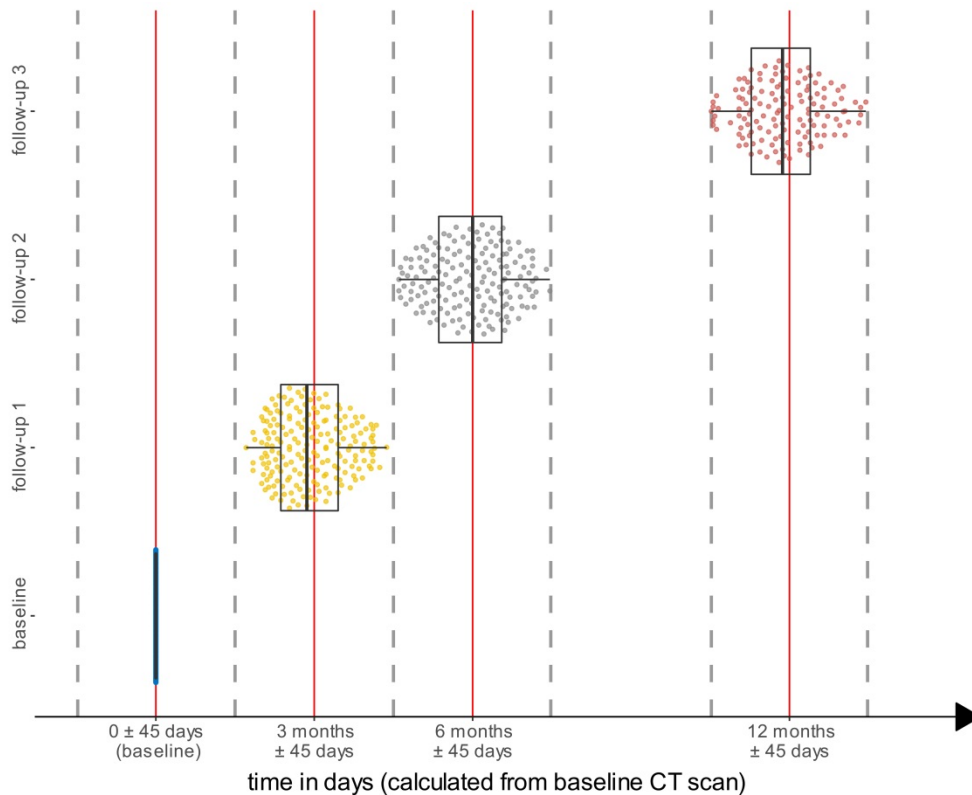

Supplement: ONCO-26-e963-s002.pdf [file ONCO-26-e963-s002.pdf]
